# Supplementary material
Source: PubMed Central journal article supplement (PMC4825572)
Supplement: kccy-14-18-1026517-s001.pdf [file kccy-14-18-1026517-s001.pdf]

**Supplementary Table 1** Primer sequences of genes for cDNA amplification

| <i>Gene</i> | <i>Primer sequence</i>                                                                                              |
|-------------|---------------------------------------------------------------------------------------------------------------------|
| SIRT3       | Forward Primer: 5' –GGGGGCCGGCCGGTGGAGGAAGCAGTGAGAA – 3'<br>Reverse Primer: 5' –GGGGGCGCGCCAGGTGAAGAAGCCATAGTC – 3' |
| SOD2        | Forward Primer: 5' –GGGGGCCGGCCG AGAGCAGCGGTTCGTGTA– 3'<br>Reverse Primer: 5' –GGGGGCGCGCC ATGTGGCCGTGAGTGAG – 3'   |

**Supplementary Table 2** Primer sequences of genes for site-directed mutagenesis of SOD2

| <i>Gene</i> | <i>Primer sequence</i>                                                                                                       |
|-------------|------------------------------------------------------------------------------------------------------------------------------|
| SOD2(K53Q)  | Forward Primer: 5' –GCAGCTGCACCACAGCCAGCACCATGCGGCCTA – 3'<br>Reverse Primer: 5' –TAGGCCGCATGGTGTCTGGCTGTGGTGCAGCTGC – 3'    |
| SOD2(K68Q)  | Forward Primer: 5' –CCAACGCCACCGAGGAGCAGTACCACGAGGCTCTG – 3'<br>Reverse Primer: 5' –CAGAGCCTCGTGGTACTGCTCCTCGGTGGCGTTGG – 3' |
| SOD2(K68R)  | Forward Primer: 5' –AACGCCACCGAGGAGAGGTACCACGAGGCTCTG– 3'<br>Reverse Primer: 5' –CAGAGCCTCGTGGTACCTCTCCTCGGTGGCGTT – 3'      |
| SOD2(K89Q)  | Forward Primer: 5' –CTCTTCAGCCTGCACTGCAGTTCAATGGTGGGGGA– 3'<br>Reverse Primer: 5' –TCCCCACCATTGAACTGCAGTGCAGGCTGAAGAG– 3'    |
